# Supplementary material
Source: PubMed Central journal article supplement (PMC4810667)
Supplement: JVI.02790-15_zjv999091442so1.pdf [file JVI.02790-15_zjv999091442so1.pdf]

**Supplemental Table 1.** List of glycans on the microarray

| Glycan # <sup>a</sup> | Structure                                                                                                                                                                                                                                  |
|-----------------------|--------------------------------------------------------------------------------------------------------------------------------------------------------------------------------------------------------------------------------------------|
| 1                     | Galβ(1-4)-GlcNAcβ-ethyl-NH <sub>2</sub>                                                                                                                                                                                                    |
| 2                     | Galβ(1-4)-GlcNAcβ(1-2)-Manα(1-3)-[Galβ(1-4)-GlcNAcβ(1-2)-Manα(1-6)]-Manβ(1-4)-GlcNAcβ(1-4)-GlcNAcβ-Asn-NH <sub>2</sub>                                                                                                                     |
| 3                     | NeuAca(2-3)-Galβ(1-4)-6-O-sulfo-GlcNAcβ-propyl-NH <sub>2</sub>                                                                                                                                                                             |
| 4                     | NeuAca(2-3)-Galβ(1-4)-[Fuca(1-3)]-6-O-sulfo-GlcNAcβ-propyl-NH <sub>2</sub>                                                                                                                                                                 |
| 5                     | NeuAca(2-3)-6-O-sulfo-Galβ(1-4)-GlcNAcβ-ethyl-NH <sub>2</sub>                                                                                                                                                                              |
| 6                     | NeuAca(2-3)-6-O-sulfo-Galβ(1-4)-[Fuca(1-3)]-GlcNAcβ-propyl-NH <sub>2</sub>                                                                                                                                                                 |
| 7                     | NeuAca(2-3)-Galβ(1-3)-6-O-sulfo-GlcNAcβ-propyl-NH <sub>2</sub>                                                                                                                                                                             |
| 8                     | NeuAca(2-3)-Galβ(1-4)-Glcβ-ethyl-NH <sub>2</sub>                                                                                                                                                                                           |
| 9                     | NeuAca(2-3)-Galβ(1-4)-GlcNAcβ-ethyl-NH <sub>2</sub>                                                                                                                                                                                        |
| 10                    | NeuAca(2-3)-Galβ(1-4)-GlcNAcβ(1-3)-Galβ(1-4)-GlcNAcβ-ethyl-NH <sub>2</sub>                                                                                                                                                                 |
| 11                    | NeuAca(2-3)-Galβ(1-4)-GlcNAcβ(1-3)-Galβ(1-4)-GlcNAcβ(1-3)-Galβ(1-4)-GlcNAcβ-ethyl-NH <sub>2</sub>                                                                                                                                          |
| 12                    | NeuAca(2-3)-GalNAcβ(1-4)-GlcNAcβ-ethyl-NH <sub>2</sub>                                                                                                                                                                                     |
| 13                    | NeuAca(2-3)-Galβ(1-3)-GlcNAcβ-ethyl-NH <sub>2</sub>                                                                                                                                                                                        |
| 14                    | NeuAca(2-3)-Galβ(1-3)-GlcNAcβ(1-3)-Galβ(1-4)-GlcNAcβ-ethyl-NH <sub>2</sub>                                                                                                                                                                 |
| 15                    | NeuAca(2-3)-Galβ(1-3)-GlcNAcβ(1-3)-Galβ(1-3)-GlcNAcβ-ethyl-NH <sub>2</sub>                                                                                                                                                                 |
| 16                    | NeuAca(2-3)-Galβ(1-3)-GalNAcβ(1-3)-Gala(1-4)-Galβ(1-4)-Glcβ-ethyl-NH <sub>2</sub>                                                                                                                                                          |
| 17                    | NeuAca(2-3)-Galβ(1-3)-GalNAca-Thr-NH <sub>2</sub>                                                                                                                                                                                          |
| 18                    | NeuAca(2-3)-Galβ(1-3)-[GlcNAcβ(1-6)]-GalNAca-Thr-NH <sub>2</sub>                                                                                                                                                                           |
| 19                    | NeuAca(2-3)-Galβ(1-4)-GlcNAcβ(1-6)-[Galβ(1-3)]-GalNAca-Thr-NH <sub>2</sub>                                                                                                                                                                 |
| 20                    | NeuAca(2-3)-Galβ(1-4)-GlcNAcβ(1-3)-Galβ(1-4)-GlcNAcβ(1-6)-[Galβ(1-3)]-GalNAca-Thr-NH <sub>2</sub>                                                                                                                                          |
| 21                    | NeuAca(2-3)-Galβ(1-4)-GlcNAcβ(1-3)-GalNAca-Thr-NH <sub>2</sub>                                                                                                                                                                             |
| 22                    | NeuAca(2-3)-Galβ(1-4)-GlcNAcβ(1-3)-Galβ(1-4)-GlcNAcβ(1-3)-GalNAca-Thr-NH <sub>2</sub>                                                                                                                                                      |
| 23                    | NeuAca(2-3)-Galβ(1-4)-GlcNAcβ(1-3)-[NeuAca(2-3)-Galβ(1-4)-GlcNAcβ(1-6)]-GalNAca-Thr-NH <sub>2</sub>                                                                                                                                        |
| 24                    | NeuAca(2-3)-Galβ(1-4)-GlcNAcβ(1-3)-Galβ(1-4)-GlcNAcβ(1-3)-[NeuAca(2-3)-Galβ(1-4)-GlcNAcβ(1-3)-Galβ(1-4)-GlcNAcβ(1-6)]-GalNAca-Thr-NH <sub>2</sub>                                                                                          |
| 25                    | NeuAca(2-3)-Galβ(1-4)-GlcNAcβ(1-2)-Manα(1-3)-[NeuAca(2-3)-Galβ(1-4)-GlcNAcβ(1-2)-Manα(1-6)]-Manβ(1-4)-GlcNAcβ(1-4)-GlcNAcβ-Asn-NH <sub>2</sub>                                                                                             |
| 26                    | NeuAca(2-3)-Galβ(1-4)-GlcNAcβ(1-3)-Galβ(1-4)-GlcNAcβ(1-2)-Manα(1-3)-[NeuAca(2-3)-Galβ(1-4)-GlcNAcβ(1-3)-Galβ(1-4)-GlcNAcβ(1-2)-Manα(1-6)]-Manβ(1-4)-GlcNAcβ(1-4)-GlcNAcβ-Asn-NH <sub>2</sub>                                               |
| 27                    | NeuAca(2-3)-Galβ(1-4)-GlcNAcβ(1-3)-Galβ(1-4)-GlcNAcβ(1-3)-Galβ(1-4)-GlcNAcβ(1-2)-Manα(1-3)-[NeuAca(2-3)-Galβ(1-4)-GlcNAcβ(1-3)-Galβ(1-4)-GlcNAcβ(1-3)-Galβ(1-4)-GlcNAcβ(1-2)-Manα(1-6)]-Manβ(1-4)-GlcNAcβ(1-4)-GlcNAcβ-Asn-NH <sub>2</sub> |
| 28                    | NeuAca(2-3)-[GalNAcβ(1-4)]-Galβ(1-4)-GlcNAcβ-ethyl-NH <sub>2</sub>                                                                                                                                                                         |
| 29                    | NeuAca(2-3)-[GalNAcβ(1-4)]-Galβ(1-4)-Glcβ-ethyl-NH <sub>2</sub>                                                                                                                                                                            |
| 30                    | Galβ(1-3)-GalNAcβ(1-4)-[NeuAca(2-3)]-Galβ(1-4)-Glcβ-ethyl-NH <sub>2</sub>                                                                                                                                                                  |
| 31                    | NeuAca(2-3)-Galβ(1-4)-[Fuca(1-3)]-GlcNAcβ-propyl-NH <sub>2</sub>                                                                                                                                                                           |
| 32                    | NeuAca(2-3)-Galβ(1-3)-[Fuca(1-4)]-GlcNAcβ(1-3)-Galβ(1-4)-[Fuca(1-3)]-GlcNAcβ-ethyl-NH <sub>2</sub>                                                                                                                                         |
| 33                    | NeuAca(2-3)-Galβ(1-4)-[Fuca(1-3)]-GlcNAcβ(1-3)-Galβ(1-4)-[Fuca(1-3)]-GlcNAcβ-ethyl-NH <sub>2</sub>                                                                                                                                         |
| 34                    | NeuAca(2-3)-Galβ(1-4)-[Fuca(1-3)]-GlcNAcβ(1-3)-Galβ(1-4)-[Fuca(1-3)]-GlcNAcβ(1-3)-Galβ(1-4)-[Fuca(1-3)]-GlcNAcβ-ethyl-NH <sub>2</sub>                                                                                                      |
| 35                    | NeuGca(2-3)-Galβ(1-4)-GlcNAcβ-ethyl-NH <sub>2</sub>                                                                                                                                                                                        |

|    |                                                                                                                                                                                                                                            |
|----|--------------------------------------------------------------------------------------------------------------------------------------------------------------------------------------------------------------------------------------------|
| 36 | NeuAca(2-6)-Galβ(1-4)-6-O-sulfo-GlcNAcβ-propyl-NH <sub>2</sub>                                                                                                                                                                             |
| 37 | NeuAca(2-6)-Galβ(1-4)-Glcβ-ethyl-NH <sub>2</sub>                                                                                                                                                                                           |
| 38 | NeuAca(2-6)-Galβ(1-4)-GlcNAcβ-ethyl-NH <sub>2</sub>                                                                                                                                                                                        |
| 39 | NeuAca(2-6)-Galβ(1-4)-GlcNAcβ(1-3)-Galβ(1-4)-GlcNAcβ-ethyl-NH <sub>2</sub>                                                                                                                                                                 |
| 40 | NeuAca(2-6)-Galβ(1-4)-GlcNAcβ(1-3)-Galβ(1-4)-GlcNAcβ(1-3)-Galβ(1-4)-GlcNAcβ-ethyl-NH <sub>2</sub>                                                                                                                                          |
| 41 | NeuAca(2-6)-Galβ(1-4)-GlcNAcβ(1-3)-[NeuAca(2-6)]-Galβ(1-4)-GlcNAcβ-ethyl-NH <sub>2</sub>                                                                                                                                                   |
| 42 | NeuAca(2-6)-GalNAcβ(1-4)-GlcNAcβ-ethyl-NH <sub>2</sub>                                                                                                                                                                                     |
| 43 | NeuAca(2-6)-[Galβ(1-3)]-GalNAca-Thr-NH <sub>2</sub>                                                                                                                                                                                        |
| 44 | NeuAca(2-6)-Galβ(1-4)-GlcNAcβ(1-6)-[Galβ(1-3)]-GalNAca-Thr-NH <sub>2</sub>                                                                                                                                                                 |
| 45 | NeuAca(2-6)-Galβ(1-4)-GlcNAcβ(1-3)-Galβ(1-4)-GlcNAcβ(1-6)-[Galβ(1-3)]-GalNAca-Thr-NH <sub>2</sub>                                                                                                                                          |
| 46 | NeuAca(2-6)-Galβ(1-4)-GlcNAcβ(1-3)-GalNAca-Thr-NH <sub>2</sub>                                                                                                                                                                             |
| 47 | NeuAca(2-6)-Galβ(1-4)-GlcNAcβ(1-3)-Galβ(1-4)-GlcNAcβ(1-3)-GalNAca-Thr-NH <sub>2</sub>                                                                                                                                                      |
| 48 | NeuAca(2-6)-Galβ(1-4)-GlcNAcβ(1-3)-[NeuAca(2-6)-Galβ(1-4)-GlcNAcβ(1-6)]-GalNAca-Thr-NH <sub>2</sub>                                                                                                                                        |
| 49 | NeuAca(2-6)-Galβ(1-4)-GlcNAcβ(1-3)-Galβ(1-4)-GlcNAcβ(1-3)-[NeuAca(2-6)-Galβ(1-4)-GlcNAcβ(1-3)-Galβ(1-4)-GlcNAcβ(1-6)]-GalNAca-Thr-NH <sub>2</sub>                                                                                          |
| 50 | Galβ(1-4)-GlcNAcβ(1-2)-Manα(1-3)-[NeuAca(2-6)-Galβ(1-4)-GlcNAcβ(1-2)-Manα(1-6)]-Manβ(1-4)-GlcNAcβ(1-4)-GlcNAcβ-Asn-NH <sub>2</sub>                                                                                                         |
| 51 | NeuAca(2-6)-Galβ(1-4)-GlcNAcβ(1-2)-Manα(1-3)-[Galβ(1-4)-GlcNAcβ(1-2)-Manα(1-6)]-Manβ(1-4)-GlcNAcβ(1-4)-GlcNAcβ-Asn-NH <sub>2</sub>                                                                                                         |
| 52 | GlcNAcβ(1-2)-Manα(1-3)-[NeuAca(2-6)-Galβ(1-4)-GlcNAcβ(1-2)-Manα(1-6)]-Manβ(1-4)-GlcNAcβ(1-4)-GlcNAcβ-Asn-NH <sub>2</sub>                                                                                                                   |
| 53 | NeuAca(2-6)-Galβ(1-4)-GlcNAcβ(1-2)-Manα(1-3)-[NeuAca(2-6)-Galβ(1-4)-GlcNAcβ(1-2)-Manα(1-6)]-Manβ(1-4)-GlcNAcβ(1-4)-GlcNAcβ-Asn-NH <sub>2</sub>                                                                                             |
| 54 | NeuAca(2-6)-Galβ(1-4)-GlcNAcβ(1-3)-Galβ(1-4)-GlcNAcβ(1-2)-Manα(1-3)-[NeuAca(2-6)-Galβ(1-4)-GlcNAcβ(1-3)-Galβ(1-4)-GlcNAcβ(1-2)-Manα(1-6)]-Manβ(1-4)-GlcNAcβ(1-4)-GlcNAcβ-Asn-NH <sub>2</sub>                                               |
| 55 | NeuAca(2-6)-Galβ(1-4)-GlcNAcβ(1-3)-Galβ(1-4)-GlcNAcβ(1-3)-Galβ(1-4)-GlcNAcβ(1-2)-Manα(1-3)-[NeuAca(2-6)-Galβ(1-4)-GlcNAcβ(1-3)-Galβ(1-4)-GlcNAcβ(1-3)-Galβ(1-4)-GlcNAcβ(1-2)-Manα(1-6)]-Manβ(1-4)-GlcNAcβ(1-4)-GlcNAcβ-Asn-NH <sub>2</sub> |
| 56 | NeuGca(2-6)-Galβ(1-4)-GlcNAcβ-ethyl-NH <sub>2</sub>                                                                                                                                                                                        |
| 57 | NeuAca(2-3)-Galβ(1-4)-GlcNAcβ(1-2)-Manα(1-3)-[NeuAca(2-6)-Galβ(1-4)-GlcNAcβ(1-2)-Manα(1-6)]-Manβ(1-4)-GlcNAcβ(1-4)-GlcNAcβ-Asn-NH <sub>2</sub>                                                                                             |
| 58 | NeuAca(2-6)-Galβ(1-4)-GlcNAcβ(1-2)-Manα(1-3)-[NeuAca(2-3)-Galβ(1-4)-GlcNAcβ(1-2)-Manα(1-6)]-Manβ(1-4)-GlcNAcβ(1-4)-GlcNAcβ-Asn-NH <sub>2</sub>                                                                                             |

<sup>a</sup> Glycans including nonsialylated controls (black, glycan no. 1 and 2), α2,3-linked sialosides (red, no. 3 to 35), α2,6-linked sialosides (blue, no. 36 to 56), and glycans possessing both α2,3- and α2,6-linked sialic-acids (checkered, no. 57 and 58)
